# Supplementary material for: Telomere length and its associations with mental disorders, age and genetic risk for mental disorders
Source: bioRxiv or medRxiv preprint supplement (doi:10.1101/2022.03.29.22273140), 2022-03-30
Supplement: Supplementary file [file media-1.pdf]

# Supplementary material

This material accompanies the article

## Telomere length and its associations with mental disorders, age and genetic risk for mental disorders

Authors: Julian Mutz and Cathryn M. Lewis

Table of contents:

|                                                                                                   |    |
|---------------------------------------------------------------------------------------------------|----|
| GWAS summary statistics .....                                                                     | 2  |
| T/S ratio in individuals with mental disorders .....                                              | 3  |
| T/S ratio in individuals with mental disorders by antidepressant medication .....                 | 4  |
| Figure: T/S ratio by antidepressant medication .....                                              | 4  |
| Table: T/S ratio by antidepressant medication .....                                               | 5  |
| Polygenic risk scores in individuals with mental disorders .....                                  | 6  |
| Associations between T/S ratio and polygenic risk scores .....                                    | 7  |
| Scatter plots .....                                                                               | 7  |
| Table .....                                                                                       | 8  |
| Sensitivity analysis.....                                                                         | 9  |
| Figure: T/S ratio, no comorbid depression and anxiety disorders.....                              | 9  |
| Table: T/S ratio, no comorbid depression and anxiety disorders .....                              | 10 |
| Sensitivity analysis stratified by antidepressant medication.....                                 | 11 |
| Figure: T/S ratio, no comorbid depression and anxiety disorders by antidepressant medication .... | 11 |
| Table: T/S ratio, no comorbid depression and anxiety disorders by antidepressant medication.....  | 12 |

## GWAS summary statistics

**Supplementary Table 1.** GWAS summary statistics

| Phenotype                 | GWAS reference                                        | Sample size |          |
|---------------------------|-------------------------------------------------------|-------------|----------|
|                           |                                                       | Cases       | Controls |
| Anxiety disorders         | Otowa et al. (2016)<br>doi: 10.1038/mp.2015.197       | 7016        | 14745    |
| Major depressive disorder | Wray et al. (2018)*<br>doi: 10.1038/s41588-018-0090-3 | 45591       | 97674    |
| Bipolar disorder          | Stahl et al. (2019)<br>doi: 10.1038/s41588-019-0397-8 | 20352       | 31358    |

*Note:* GWAS = genome wide association study. \*Summary statistics from Wray et al. (2018) excluding UK Biobank and 23andMe data.

## T/S ratio in individuals with mental disorders

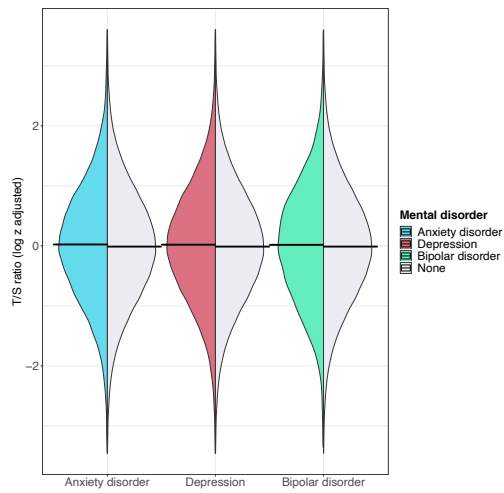

**Supplement Figure 1.** Average T/S ratio (log z adjusted) in individuals with mental disorders and non-psychiatric controls. Horizontal lines show group means. T/S ratio values below the 0.01st or above the 99.99th percentile not shown.

## T/S ratio in individuals with mental disorders by antidepressant medication

Figure: T/S ratio by antidepressant medication

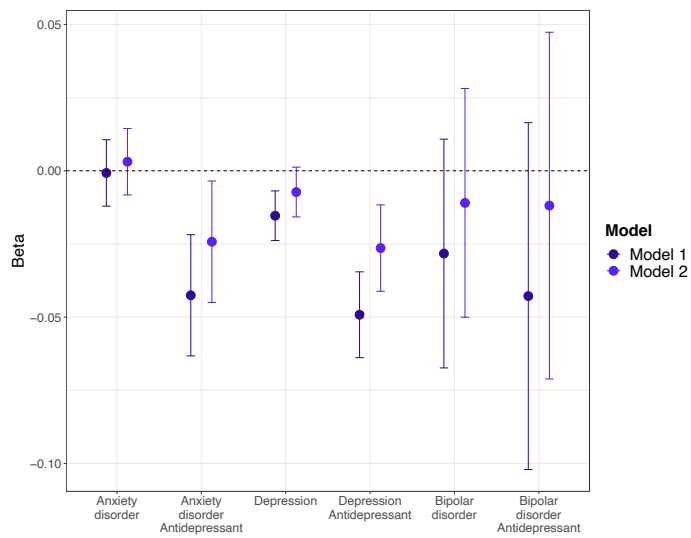

**Supplement Figure 2.** Average T/S ratio (log z adjusted) in individuals with mental disorders compared to non-psychiatric controls (reference group) stratified by antidepressant medication use. Estimates shown are ordinary least squares regression beta coefficients and 95% confidence intervals. Model 1 – adjusted for age and sex; Model 2 – adjusted for age, sex, white blood cell count, Townsend deprivation index, physical activity, smoking status, body mass index, body fat percentage and C-reactive protein.

Table: T/S ratio by antidepressant medication

**Supplement Table 2.** T/S ratio (log z adjusted) in individuals with mental disorders by antidepressant medication

| Term             | Model 1 |        |        |                    |                 | Model 2 |        |        |                    |                 |
|------------------|---------|--------|--------|--------------------|-----------------|---------|--------|--------|--------------------|-----------------|
|                  | $\beta$ | 95% CI |        | $p_{\text{Bonf.}}$ | $p_{\text{BH}}$ | $\beta$ | 95% CI |        | $p_{\text{Bonf.}}$ | $p_{\text{BH}}$ |
| Controls         | Ref     | -      | -      | -                  | -               | Ref     | -      | -      | -                  | -               |
| Anxiety disorder | -0.001  | -0.012 | 0.011  | >0.999             | 0.898           | 0.003   | -0.008 | 0.014  | >0.999             | 0.712           |
| + Antidepressant | -0.043  | -0.063 | -0.022 | <0.001             | <0.001          | -0.024  | -0.045 | -0.004 | 0.264              | 0.053           |
| Depression       | -0.015  | -0.024 | -0.007 | 0.005              | 0.001           | -0.007  | -0.016 | 0.001  | >0.999             | 0.188           |
| + Antidepressant | -0.049  | -0.064 | -0.035 | <0.001             | <0.001          | -0.026  | -0.041 | -0.012 | 0.005              | 0.001           |
| Bipolar disorder | -0.028  | -0.067 | 0.011  | >0.999             | 0.235           | -0.011  | -0.05  | 0.028  | >0.999             | 0.712           |
| + Antidepressant | -0.043  | -0.102 | 0.016  | >0.999             | 0.235           | -0.012  | -0.071 | 0.047  | >0.999             | 0.757           |

*Note:*  $\beta$  = ordinary least squares regression beta coefficient; CI = confidence interval; Ref = reference group; Bonf. = Bonferroni; BH = Benjamini & Hochberg. Model 1 – adjusted for age and sex; Model 2 – adjusted for age, sex, white blood cell count, Townsend deprivation index, physical activity, smoking status, body mass index, body fat percentage and C-reactive protein. *P*-values corrected for 12 tests.

## Polygenic risk scores in individuals with mental disorders

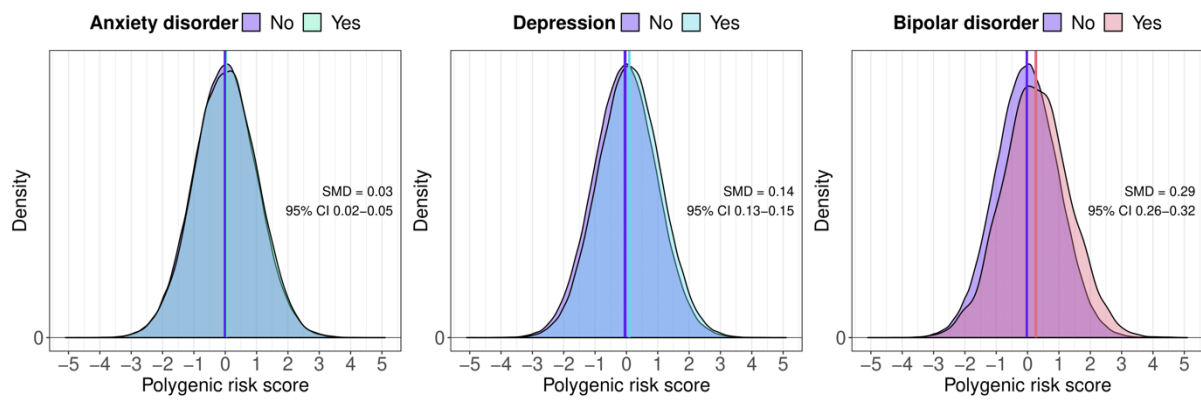

**Supplement Figure 3.** Differences in polygenic risk scores for anxiety disorder (left panel), depression (middle panel) and bipolar disorder (right panel) between individuals with these disorders and non-psychiatric controls.

## Associations between T/S ratio and polygenic risk scores

### Scatter plots

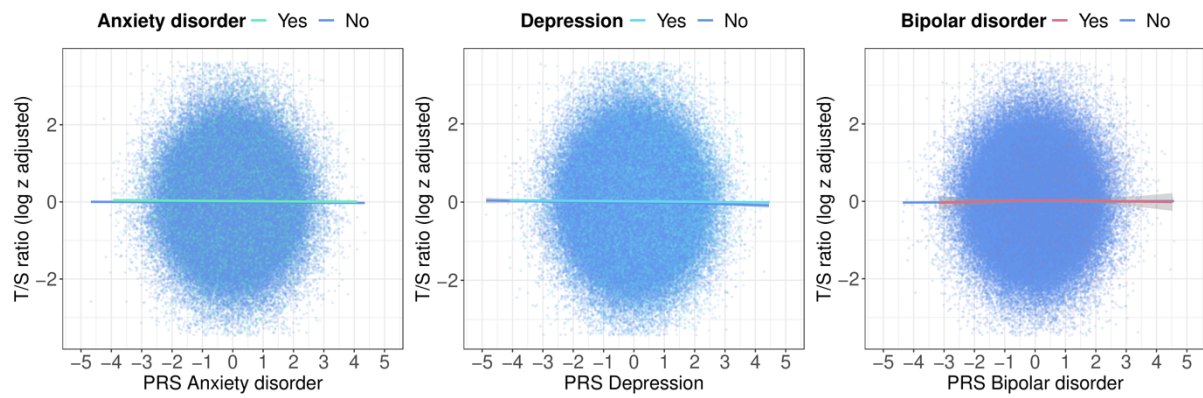

**Supplement Figure 4.** Associations between average T/S ratio (log z adjusted) and polygenic risk scores for anxiety disorder, depression and bipolar disorder. T/S ratio values below the 0.01st or above the 99.99th percentile not shown.

Table

**Supplement Table 3.** Associations between T/S ratio (log z adjusted) and polygenic risk scores for mental disorders.

| PRS              | Full sample |        |        |                    |                 | Cases   |        |       |                    |                 | Controls |        |        |                    |                 |
|------------------|-------------|--------|--------|--------------------|-----------------|---------|--------|-------|--------------------|-----------------|----------|--------|--------|--------------------|-----------------|
|                  | $\beta$     | 95% CI |        | $p_{\text{Bonf.}}$ | $p_{\text{BH}}$ | $\beta$ | 95% CI |       | $p_{\text{Bonf.}}$ | $p_{\text{BH}}$ | $\beta$  | 95% CI |        | $p_{\text{Bonf.}}$ | $p_{\text{BH}}$ |
| Anxiety disorder | -0.002      | -0.006 | 0.001  | 0.589              | 0.196           | -0.006  | -0.015 | 0.004 | >0.999             | 0.350           | -0.002   | -0.006 | 0.002  | >0.999             | 0.385           |
| Depression       | -0.006      | -0.010 | -0.003 | 0.001              | 0.001           | -0.006  | -0.012 | 0.001 | 0.592              | 0.236           | -0.008   | -0.012 | -0.004 | 0.001              | 0.001           |
| Bipolar disorder | 0.003       | -0.001 | 0.008  | 0.342              | 0.171           | -0.003  | -0.036 | 0.030 | >0.999             | 0.858           | 0.003    | -0.001 | 0.008  | 0.707              | 0.236           |

*Note:* PRS = polygenic risk score;  $\beta$  = ordinary least squares regression beta coefficient; CI = confidence interval; Ref = reference group; Bonf. = Bonferroni; BH = Benjamini & Hochberg. All analyses were adjusted for the first six ancestry-informative population principal components, batch number and assessment centre. *P*-values adjusted for three (full sample) and six (cases and controls) tests.



## Sensitivity analysis

Figure: T/S ratio, no comorbid depression and anxiety disorders

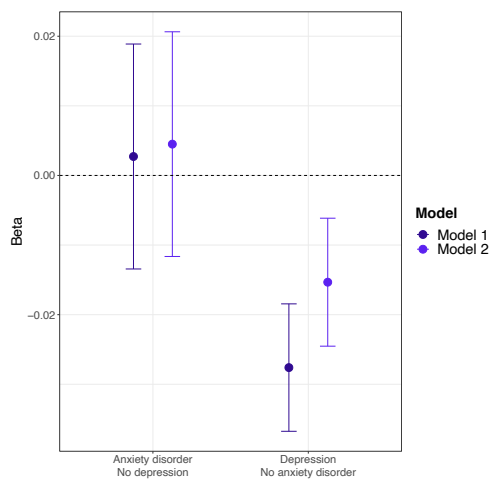

**Supplement Figure 5.** Average T/S ratio (log z adjusted) in individuals with anxiety disorders or depression compared to non-psychiatric controls (reference group), excluding individuals with comorbid anxiety disorders and depression. Estimates shown are ordinary least squares regression beta coefficients and 95% confidence intervals. Model 1 – adjusted for age and sex; Model 2 – adjusted for age, sex, white blood cell count, Townsend deprivation index, physical activity, smoking status, body mass index, body fat percentage and C-reactive protein.

Table: T/S ratio, no comorbid depression and anxiety disorders

**Supplement Table 4.** Average T/S ratio (log z adjusted), no comorbid depression and anxiety disorders.

| Term             | Model 1 |        |        |                    |                 | Model 2 |        |        |                    |                 |
|------------------|---------|--------|--------|--------------------|-----------------|---------|--------|--------|--------------------|-----------------|
|                  | $\beta$ | 95% CI |        | $p_{\text{Bonf.}}$ | $p_{\text{BH}}$ | $\beta$ | 95% CI |        | $p_{\text{Bonf.}}$ | $p_{\text{BH}}$ |
| Controls         | Ref     | -      | -      | -                  | -               | Ref     | -      | -      | -                  | -               |
| Anxiety disorder | 0.003   | -0.013 | 0.019  | >0.999             | 0.741           | 0.004   | -0.012 | 0.021  | >0.999             | 0.741           |
| Depression       | -0.028  | -0.037 | -0.018 | <0.001             | <0.001          | -0.015  | -0.025 | -0.006 | 0.004              | 0.002           |

*Note:*  $\beta$  = ordinary least squares regression beta coefficient; CI = confidence interval; Ref = reference group; Bonf. = Bonferroni; BH = Benjamini & Hochberg. Model 1 – adjusted for age and sex; Model 2 – adjusted for age, sex, white blood cell count, Townsend deprivation index, physical activity, smoking status, body mass index, body fat percentage and C-reactive protein. *P*-values corrected for four tests.

## Sensitivity analysis stratified by antidepressant medication

Figure: T/S ratio, no comorbid depression and anxiety disorders by antidepressant medication

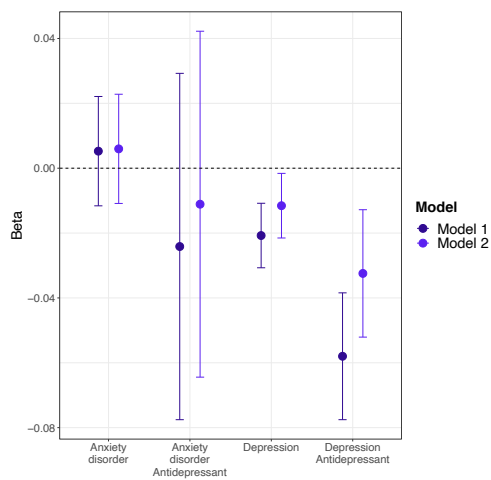

**Supplement Figure 6.** Average T/S ratio (log z adjusted) in individuals with anxiety disorders or depression compared to non-psychiatric controls (reference group) stratified by antidepressant medication use, excluding individuals with comorbid anxiety disorders and depression. Estimates shown are ordinary least squares regression beta coefficients and 95% confidence intervals. Model 1 – adjusted for age and sex; Model 2 – adjusted for age, sex, white blood cell count, Townsend deprivation index, physical activity, smoking status, body mass index, body fat percentage and C-reactive protein.

Table: T/S ratio, no comorbid depression and anxiety disorders by antidepressant medication

**Supplement Table 5.** Average T/S ratio (log z adjusted), no comorbid depression and anxiety disorders, by antidepressant medication

| Term             | Model 1 |        |        |                    |                 | Model 2 |        |        |                    |                 |
|------------------|---------|--------|--------|--------------------|-----------------|---------|--------|--------|--------------------|-----------------|
|                  | $\beta$ | 95% CI |        | $p_{\text{Bonf.}}$ | $p_{\text{BH}}$ | $\beta$ | 95% CI |        | $p_{\text{Bonf.}}$ | $p_{\text{BH}}$ |
| Controls         | Ref     | -      | -      | -                  | -               | Ref     | -      | -      | -                  | -               |
| Anxiety disorder | 0.005   | -0.012 | 0.022  | >0.999             | 0.618           | 0.006   | -0.011 | 0.023  | >0.999             | 0.618           |
| + Antidepressant | -0.024  | -0.078 | 0.029  | >0.999             | 0.601           | -0.011  | -0.064 | 0.042  | >0.999             | 0.683           |
| Depression       | -0.021  | -0.031 | -0.011 | <0.001             | <0.001          | -0.012  | -0.022 | -0.002 | 0.184              | 0.046           |
| + Antidepressant | -0.058  | -0.078 | -0.038 | <0.001             | <0.001          | -0.032  | -0.052 | -0.013 | 0.010              | 0.003           |

*Note:*  $\beta$  = ordinary least squares regression beta coefficient; CI = confidence interval; Ref = reference group; Bonf. = Bonferroni; BH = Benjamini & Hochberg. Model 1 – adjusted for age and sex; Model 2 – adjusted for age, sex, white blood cell count, Townsend deprivation index, physical activity, smoking status, body mass index, body fat percentage and C-reactive protein. *P*-values corrected for eight tests.
